# Supplementary material for: CO2 Emissions are First Aggravated and then Alleviated with Economic Growth in China: A New Multidimensional EKC Analysis
Source: Research Square preprint supplement (doi:10.21203/rs.3.rs-596739/v1), 2021-07-20
Supplement: Supplementary file 1 [file 0d016d235674d1c0121fea1d.xlsx]

## Sheet: 1-CO2
Region	1997	1998	1999	2000	2001	2002	2003	2004	2005	2006	2007	2008	2009	2010	2011	2012	2013	2014	2015	2016	2017
Beijing	61.9	63.3	66.6	68.2	77.4	77.9	82	88.1	92.1	96.7	102.9	99.2	100.4	103	94.4	97.2	93.4	92.5	95.2	89	85
Tianjin	51.4	51.8	53	58.2	60.4	65.1	66.2	78.3	89	95.5	103.4	110.2	122.3	136.6	152	158	157	155.4	151.9	147	141
Hebei	212.1	211.3	222.8	237.3	251.5	284.4	328.6	374.2	459.1	486.7	529	554.4	577.8	647	724.6	714.5	768.9	751.9	734.1	748	726
Shanxi	148.7	147.5	145.6	148	184.2	221.4	251.7	267.9	290	320.1	344.9	370.9	375.4	406.5	438.8	466	488.2	475.7	440.2	449	488
InnerMongolia	97	92.4	97.3	105.5	115.8	127.1	149.3	207.3	240.5	290.7	340	411.4	445.3	477.4	598.2	621.6	576.2	582.2	584.7	590	639
Liaoning	200.7	190.6	184.5	213	205.5	220.7	236.7	250.2	279.6	317.9	362.2	371.4	406.9	446.3	455.1	461	482	484.5	472.1	457	479
Jilin	98.6	83.3	84	83	89.1	92.2	134.3	112.3	143.4	158.9	170.5	179.4	185.7	202.1	233.9	229.5	222.3	222.6	207.6	201	204
Heilongjiang	129.1	124.2	122.1	125.3	121.1	117.9	129.6	140.2	158.1	179	187.4	197.3	203.2	218.3	247.4	269.2	256.8	269.1	265.5	269	269
Shanghai	103.2	104.4	115.6	118	122.5	128.4	137	148.7	158.9	165.2	174.8	178.2	179.1	187.1	200.2	194.8	201.2	187.7	188.6	188	190
Jiangsu	183.9	186.6	194	199.4	191.6	220.1	250.8	311.6	396.1	440.9	468.7	496.6	515.6	580.3	633.3	656.2	694.3	704.5	759.5	724	736
Zhejiang	115.4	114.9	121.1	131.4	142.9	156.5	178.4	218	255.8	290.3	325.3	330.2	338.5	358.6	379.4	377.2	379	375.3	375.4	372	382
Anhui	109.5	105.8	113.2	118.7	127	112.8	168	153.8	156.7	175.8	197.7	225	251.5	261.9	291.3	318.2	343.1	350.4	351.3	362	371
Fujian	44.2	46.6	60.2	56.4	56.4	67.3	82.8	100.2	123.9	135.4	161.3	165.7	187.8	199.4	236.9	232.2	229.4	243.4	230.4	213	230
Jiangxi	51.8	50.7	51.4	53.3	58	63.3	75.9	89.2	96.4	108.8	127.2	130.3	142.2	148.4	164	164	197.4	202.3	210.4	213	224
Shandong	199.3	212.7	213.5	194.8	232.7	258.8	325	397.7	556.5	605.5	663	697.7	717.9	766.6	800.8	842.2	761.6	790.4	824.4	833	806
Henan	154.3	155.8	157.2	162.1	181.3	194.3	215.7	277.6	336.2	379	426.2	435.6	450.7	504.7	548.5	520.7	483.9	535.4	517.8	513	494
Hubei	133.9	132.6	135	136.8	135.2	154.2	165.2	182.2	189.3	225.2	249.8	254	275.2	324.3	373.6	367.6	309.2	310.2	308.2	311	325
Hunan	98	99.2	80.6	77.3	85.4	92.1	104.9	125.3	178.5	203.2	223.3	226.5	239	254.9	285.5	281.7	271.2	269.9	289.2	294	310
Guangdong	165.1	172.8	185.2	199.6	210	231.5	261.7	296.9	341.8	376.2	410.1	416.9	437.6	471.5	520.6	504.7	496.8	503.8	444.1	518	542
Guangxi	50.8	51.8	52.4	56.2	56.1	56.5	66.7	86.6	98.9	112.8	128.2	133	151.8	171.8	192.3	204.9	210	207.8	269.7	211	221
Hainan	7.2	10.4	8.1	8.7	9.2	12.4	15.6	17.2	16.5	19.2	21.7	24.8	27	28.9	34.9	37.3	39.5	40.7	42.3	40	42
Chongqing	55.4	63.7	69.1	71.3	65.2	70	68.4	68.3	81.6	90	99.2	126.3	133.1	141.5	160.3	164.8	140.3	156.2	179.3	154	158
Sichuan	123.1	123	109.3	105	108.8	124	157.2	175	170.1	189.8	208.5	230.1	263.1	303.8	303.4	330.7	343.1	341.3	322.8	310	309
Guizhou	72.2	78.3	77.2	81.2	82.9	86.3	110.1	128.6	145.6	169.6	172	163.4	184.7	191.5	211	230.1	233.2	231	233.6	249	255
Yunnan	58	56.8	54.9	53	61.4	72.3	88.8	58.7	133.1	150.2	161.2	163.8	187.2	194.2	205.4	211.7	206.2	194.6	175.9	180	195
Shaanxi	68.9	65.7	59.3	58.9	68.4	76.3	86.3	107.7	122.3	128.7	148.1	165.4	186	218.6	243.8	261.9	265.6	277.2	276.9	265	262
Gansu	50.3	50.9	51.5	54.3	56.1	59	67	77.9	84.2	89.4	97.8	103.3	100.8	126.5	138.9	152.7	159.6	163.5	158.5	152	151
qinghai	11.5	11.6	13.7	12.1	14.7	15.7	17.6	19	19.9	24.4	26	31.6	33.5	31.8	36.6	44.6	47.9	48.5	51.1	56	53
Ningxia	17.1	17.6	17.4	17.3667	24.9889	57.6	55.3	65.8	51.7	58.8	66.5	75.4	80	95.3	137.3	135	142.9	142.6	140.8	137	175
Xinjiang	63.2	63.5	62.3	65.4	53.5	69.7	77.2	90.2	101.1	113.9	125.3	137.2	156.7	167.6	203	251.5	292.7	329.2	342.5	370	404

## Sheet: 2-GDP(1997-2017)
Region	1997	1998	1999	2000	2001	2002	2003	2004	2005	2006	2007	2008	2009	2010	2011	2012	2013	2014	2015	2016	2017
Beijing	2077.09	2377.18	2678.82	3161.66	3707.96	4315	5007.21	6033.21	6969.52	8117.78	9846.81	11115	12153	14113.6	16251.9	17879.4	19800.8	21330.8	23014.6	25669.1	28014.9
Tianjin	1264.63	1374.6	1500.95	1701.88	1919.09	2150.76	2578.03	3110.97	3905.64	4462.74	5252.76	6719.01	7521.85	9224.46	11307.3	12893.9	14442	15726.9	16538.2	17885.4	18549.2
Hebei	3953.78	4256.01	4514.19	5043.96	5516.76	6018.28	6921.29	8477.63	10012.1	11467.6	13607.3	16012	17235.5	20394.3	24515.8	26575	28443	29421.2	29806.1	32070.5	34016.3
Shanxi	1476	1611.08	1667.1	1845.72	2029.53	2324.8	2855.23	3571.37	4230.53	4878.61	6024.45	7315.4	7358.31	9200.86	11237.5	12112.8	12665.2	12761.5	12766.5	13050.4	15528.4
InnerMongolia	1153.51	1262.54	1379.31	1539.12	1713.81	1940.94	2388.38	3041.07	3905.03	4944.25	6423.18	8496.2	9740.25	11672	14359.9	15880.6	16916.5	17770.2	17831.5	18128.1	16096.2
Liaoning	3582.46	3881.73	4171.69	4669.06	5033.08	5458.22	6002.54	6672	8047.26	9304.52	11164.3	13668.6	15212.5	18457.3	22226.7	24846.4	27213.2	28626.6	28669	22246.9	23409.2
Jilin	1464.34	1577.05	1672.96	1951.51	2120.35	2348.54	2662.08	3122.01	3620.27	4275.12	5284.69	6426.1	7278.75	8667.58	10568.8	11939.2	13046.4	13803.1	14063.1	14776.8	14944.5
Heilongjiang	2667.5	2774.4	2866.3	3151.4	3390.1	3637.2	4057.4	4750.6	5513.7	6211.8	7104	8314.37	8587	10368.6	12582	13691.6	14454.9	15039.4	15083.7	15386.1	15902.7
Shanghai	3438.79	3801.09	4188.73	4771.17	5210.12	5741.03	6694.23	8072.83	9247.66	10572.2	12494	14069.9	15046.5	17166	19195.7	20181.7	21818.2	23567.7	25123.5	28178.7	30633
Jiangsu	6680.34	7199.95	7697.82	8553.69	9456.84	10606.9	12442.9	15003.6	18598.7	21742	26018.5	30982	34457.3	41425.5	49110.3	54058.2	59753.4	65088.3	70116.4	77388.3	85869.8
Zhejiang	4686.11	5052.62	5443.92	6141.03	6898.34	8003.67	9705.02	11648.7	13417.7	15718.5	18753.7	21462.7	22990.3	27722.3	32318.8	34665.3	37756.6	40173	42886.5	47251.4	51768.3
Anhui	2347.32	2542.96	2712.34	2902.09	3246.71	3519.72	3923.11	4759.3	5350.17	6112.5	7360.92	8851.66	10062.8	12359.3	15300.6	17212	19229.3	20848.8	22005.6	24407.6	27018
Fujian	2870.9	3159.91	3414.19	3764.54	4072.85	4467.55	4983.67	5763.35	6554.69	7583.85	9248.53	10823	12236.5	14737.1	17560.2	19701.8	21868.5	24055.8	25979.8	28810.6	32182.1
Jiangxi	1605.77	1719.87	1853.65	2003.07	2175.68	2450.48	2807.41	3456.7	4056.76	4820.53	5800.25	6971.05	7655.18	9451.26	11702.8	12948.9	14410.2	15714.6	16723.8	18499	20006.3
Shandong	6537.07	7021.35	7493.84	8337.47	9195.04	10275.5	12078.1	15021.8	18366.9	21900.2	25776.9	30933.3	33896.7	39169.9	45361.8	50013.2	55230.3	59426.6	63002.3	68024.5	72634.1
Henan	4041.09	4308.24	4517.94	5052.99	5533.01	6035.48	6867.7	8553.79	10587.4	12362.8	15012.5	18018.5	19480.5	23092.4	26931	29599.3	32191.3	34938.2	37002.2	40471.8	44552.8
Hubei	2856.47	3114.02	3229.29	3545.39	3880.53	4212.82	4757.45	5633.24	6590.19	7617.47	9333.4	11328.9	12961.1	15967.6	19632.3	22250.5	24791.8	27379.2	29550.2	32665.4	35478.1
Hunan	2849.27	3025.53	3214.54	3551.49	3831.9	4151.54	4659.99	5641.94	6596.1	7688.67	9439.6	11555	13059.7	16038	19669.6	22154.2	24621.7	27037.3	28902.2	31551.4	33903
Guangdong	7774.53	8530.88	9250.68	10741.2	12039.2	13502.4	15844.6	18864.6	22557.4	26587.8	31777	36796.7	39482.6	46013.1	53210.3	57067.9	62474.8	67809.9	72812.6	80854.9	89705.2
Guangxi	1817.25	1911.3	1971.41	2080.04	2279.34	2523.73	2821.11	3433.5	3984.1	4746.16	5823.41	7021	7759.16	9569.85	11720.9	13035.1	14449.9	15672.9	16803.1	18317.6	18523.3
Hainan	411.16	442.13	476.67	526.82	579.17	642.73	713.96	819.66	918.75	1065.67	1254.17	1503.06	1654.21	2064.5	2522.66	2855.54	3177.56	3500.72	3702.76	4053.2	4462.54
Chongqing	1509.75	1602.38	1663.2	1791	1976.86	2232.86	2555.72	3034.58	3467.72	3907.23	4676.13	5793.66	6530.01	7925.58	10011.4	11409.6	12783.3	14262.6	15717.3	17740.6	19424.7
Sichuan	3241.47	3474.09	3649.12	3928.2	4293.49	4725.01	5333.09	6379.63	7385.1	8690.24	10562.4	12601.2	14151.3	17185.5	21026.7	23872.8	26392.1	28536.7	30053.1	32934.5	36980.2
Guizhou	805.79	858.39	937.5	1029.92	1133.27	1243.43	1426.34	1677.8	2005.42	2338.98	2884.11	3561.56	3912.68	4602.16	5701.84	6852.2	8086.86	9266.39	10502.6	11776.7	13540.8
Yunnan	1676.17	1831.33	1899.82	2011.19	2138.31	2312.82	2556.02	3081.91	3462.73	3988.14	4772.52	5692.12	6169.75	7224.18	8893.12	10309.5	11832.3	12814.6	13619.2	14788.4	16376.3
Shaanxi	1363.6	1458.4	1592.64	1804	2010.62	2253.39	2587.72	3175.58	3933.72	4743.61	5757.29	7314.58	8169.8	10123.5	12512.3	14453.7	16205.5	17689.9	18021.9	19399.6	21898.8
Gansu	793.57	887.67	956.32	1052.88	1125.37	1232.03	1399.83	1688.49	1933.98	2277.35	2703.98	3166.82	3387.56	4120.75	5020.37	5650.2	6330.69	6836.82	6790.32	7200.37	7459.9
qinghai	202.79	220.92	239.38	263.68	300.13	340.65	390.2	466.1	543.32	648.5	797.35	1018.62	1081.27	1350.43	1670.44	1893.54	2122.06	2303.32	2417.05	2572.49	2624.83
Ningxia	224.59	245.44	264.58	295.02	337.44	377.16	445.36	537.11	612.61	725.9	919.11	1203.92	1353.31	1689.65	2102.21	2341.29	2577.57	2752.1	2911.77	3168.59	3443.56
Xinjiang	1039.85	1106.95	1163.17	1363.56	1491.6	1612.65	1886.35	2209.09	2604.19	3045.26	3523.16	4183.21	4277.05	5437.47	6610.05	7505.31	8443.84	9273.46	9324.8	9649.7	10882

## Sheet: 3-RealGDP
Region	1997	1998	1999	2000	2001	2002	2003	2004	2005	2006	2007	2008	2009	2010	2011	2012	2013	2014	2015	2016	2017
Beijing	2077.09	2274.41	2522.32	2819.96	3149.89	3512.13	3898.47	4448.15	4973.03	5569.8	6377.42	6957.76	7667.45	8457.2	9142.23	9846.19	10604.3	11378.5	12163.6	12990.7	13861.1
Tianjin	1264.63	1382.24	1520.46	1684.67	1886.84	2126.46	2441.18	2826.89	3242.44	3709.35	4284.3	4991.21	5814.76	6826.53	7946.08	9042.64	10173	11190.3	12231	13344	13824.4
Hebei	3953.78	4376.83	4775.13	5228.76	5683.67	6229.3	6951.9	7848.69	8900.42	10075.3	11364.9	12512.8	13764	15443.2	17188.3	18838.4	20383.2	21708.1	23184.2	24760.7	26395
Shanxi	1476	1622.12	1740.54	1904.15	2096.47	2366.91	2719.58	3132.96	3527.71	3943.98	4571.08	4959.62	5227.44	5954.05	6728.08	7407.61	8066.89	8462.17	8724.5	9117.1	9764.41
InnerMongolia	1153.51	1276.94	1389.31	1539.35	1704.06	1929	2274.29	2740.52	3392.76	4003.46	4772.12	5621.56	6571.6	7557.34	8638.04	9631.42	10498.2	11317.1	12188.5	13066.1	13588.7
Liaoning	3582.46	3879.8	4197.95	4571.57	4983.01	5491.27	6122.77	6906.48	7755.98	8826.31	10150.3	11510.4	13018.2	14866.8	16680.6	18265.2	19854.3	21005.9	21636.1	21095.2	21981.1
Jilin	1464.34	1597.59	1728.6	1887.63	2063.18	2259.18	2489.62	2793.35	3131.35	3601.05	4180.82	4849.75	5509.31	6269.6	7134.8	7990.98	8654.23	9216.75	9797.41	10473.4	11028.5
Heilongjiang	2667.5	2888.9	3105.57	3360.23	3672.73	4047.35	4460.18	4982.02	5559.93	6227.12	6974.38	7797.35	8686.25	9789.4	10993.5	12092.9	13060.3	13791.7	14577.8	15467	16456.9
Shanghai	3438.79	3792.99	4187.46	4648.08	5136.12	5716.51	6419.64	7331.22	8144.99	9122.39	10509	11528.4	12473.7	13758.5	14886.7	16003.2	17235.4	18441.9	19714.4	21074.7	22528.8
Jiangsu	6680.34	7415.18	8164.11	9029.51	9950.52	11114.7	12626.3	14495	16596.8	19069.7	21911.1	24693.8	27755.9	31280.9	34721.8	38228.7	41898.6	45543.8	49415	53269.4	57104.8
Zhejiang	4686.11	5164.09	5680.5	6305.36	6973.73	7852.42	9006.72	10312.7	11632.7	13214.8	15157.3	16688.2	18173.5	20336.1	22166.4	23939.7	25902.7	27871.4	30101.1	32388.7	34915.1
Anhui	2347.32	2542.15	2773.48	3003.68	3271.01	3585.03	3922.02	4443.65	4959.11	5598.84	6393.87	7205.89	8135.45	9323.23	10581.9	11862.3	13095.9	14300.8	15544.9	16897.4	18333.6
Fujian	2870.9	3180.96	3495.87	3820.99	4153.41	4577.06	5103.42	5705.63	6367.48	7220.72	8318.27	9399.65	10555.8	12023.1	13501.9	15041.1	16695.6	18348.5	19999.9	21679.9	23435.9
Jiangxi	1605.77	1719.78	1853.92	2002.24	2178.43	2407.17	2720.1	3079.15	3473.29	3900.5	4415.37	4998.19	5652.96	6444.37	7249.92	8047.41	8860.2	9719.64	10604.1	11558.5	12575.6
Shandong	6537.07	7243.07	7967.38	8788.02	9666.82	10797.8	12244.8	14130.4	16278.3	18671.2	21322.5	23881.2	26794.7	30090.4	33370.3	36640.6	40158.1	43651.8	47144	50726.9	54480.7
Henan	4041.09	4396.71	4752.84	5204.36	5672.75	6211.66	6876.31	7818.36	8928.57	10187.5	11674.9	13087.5	14514.1	16328.3	18271.4	20116.8	21927.3	23878.9	25860.8	27955.5	30136.1
Hubei	2856.47	3102.13	3344.09	3631.68	3954.9	4318.76	4737.67	5268.29	5905.76	6620.35	7586.93	8603.57	9765.06	11210.3	12757.3	14198.9	15633	17149.4	18675.7	20188.4	21763.1
Hunan	2849.27	3091.46	3351.14	3652.74	3981.49	4339.82	4756.45	5331.98	5950.49	6670.5	7671.07	8737.35	9934.37	11384.8	12842	14293.2	15736.8	17231.8	18696.5	20192.2	21807.6
Guangdong	7774.53	8614.18	9484.21	10574.9	11685.3	13134.2	15078.1	17309.7	19698.4	22475.9	25824.8	28510.5	31276.1	35154.3	38669.7	41840.6	45397.1	48938.1	52853.1	56817.1	61078.4
Guangxi	1817.25	1998.97	2158.89	2329.45	2522.79	2790.21	3074.81	3437.63	3891.4	4416.74	5083.67	5734.38	6531.46	7458.92	8376.37	9322.9	10273.8	11147.1	12050	12929.7	13847.7
Hainan	411.16	446.109	484.028	527.59	575.601	630.859	697.73	772.387	851.17	957.567	1108.86	1223.07	1366.17	1584.76	1774.93	1936.45	2128.16	2309.06	2489.16	2675.85	2863.16
Chongqing	1509.75	1639.59	1767.48	1917.71	2090.31	2303.52	2568.42	2881.77	3213.17	3605.18	4178.4	4784.27	5497.13	6437.14	7492.83	8511.85	9558.81	10600.7	11766.8	13025.8	14237.3
Sichuan	3241.47	3555.89	3790.58	4112.78	4482.93	4944.67	5503.42	6202.36	6983.85	7912.7	9060.05	10056.7	11514.9	13253.6	15241.7	17162.1	18878.3	20483	22101.1	23825	25754.8
Guizhou	805.79	874.282	951.219	1031.12	1121.86	1223.95	1347.57	1501.19	1675.33	1867.99	2144.45	2386.78	2658.87	2999.21	3449.09	3918.16	4407.93	4883.99	5406.58	5974.27	6583.64
Yunnan	1676.17	1811.94	1944.21	2090.03	2232.15	2433.04	2647.15	2946.28	3211.44	3593.6	4032.02	4459.42	4999.01	5613.89	6382.99	7212.78	8085.52	8740.45	9500.87	10327.4	11308.6
Shaanxi	1363.6	1521.78	1678.52	1853.09	2034.69	2260.54	2527.28	2853.3	3212.82	3620.85	4192.94	4880.58	5544.34	6353.82	7237	8170.57	9069.33	9949.06	10735	11550.9	12475
Gansu	793.57	870.546	948.895	1040.94	1142.95	1256.1	1390.51	1550.41	1733.36	1930.97	2168.47	2387.49	2633.4	2944.14	3312.16	3729.49	4132.28	4500.05	4864.56	5234.26	5422.69
qinghai	202.79	220.838	238.726	259.973	290.39	325.527	364.265	409.069	458.975	514.97	584.491	663.398	730.401	842.152	955.843	1073.41	1189.34	1298.76	1405.26	1517.68	1628.47
Ningxia	224.59	244.354	266.59	293.782	323.454	356.447	401.715	446.708	495.399	557.323	628.104	707.245	791.407	898.247	1006.93	1122.73	1232.76	1331.38	1437.89	1554.36	1675.6
Xinjiang	1039.85	1117.84	1200.56	1305.01	1417.24	1533.45	1705.2	1899.59	2106.65	2338.38	2623.66	2912.26	3148.15	3481.86	3899.68	4367.64	4848.09	5332.89	5802.19	6243.15	6717.63

## Sheet: 4-SecondIndustry_GDP
Region	1997	1998	1999	2000	2001	2002	2003	2004	2005	2006	2007	2008	2009	2010	2011	2012	2013	2014	2015	2016	2017
Beijing	781.85	840.57	907.34	1033.29	1142.35	1249.99	1487.15	1853.58	2026.51	2191.43	2509.4	2626.41	2855.55	3388.38	3752.48	4059.27	4292.56	4544.8	4542.64	4944.44	5326.76
Tianjin	676.01	697.99	758.51	863.83	959.06	1069.08	1337.31	1685.93	2135.07	2457.08	2892.53	3709.78	3987.84	4840.23	5928.32	6663.82	7275.45	7731.85	7704.22	7571.35	7593.59
Hebei	1934.38	2084.33	2188.59	2514.96	2696.63	2911.69	3417.56	4301.73	5271.57	6110.43	7201.88	8701.34	8959.83	10707.7	13126.9	14003.6	14781.9	15012.9	14386.9	15256.9	15846.2
Shanxi	707.57	761.25	785.47	858.37	956.01	1134.31	1463.38	1919.4	2357.04	2755.66	3454.49	4242.36	3993.8	5234	6635.26	6731.56	6613.06	6293.91	5194.27	5028.99	6778.89
InnerMongolia	422.39	458.86	510.47	582.57	655.68	754.78	967.49	1248.27	1773.21	2374.96	3193.67	4376.19	5114	6367.69	8037.69	8801.5	9104.08	9119.79	9000.58	8553.63	6399.68
Liaoning	1743.87	1855.22	2001.48	2344.4	2440.55	2609.85	2898.89	3061.62	3869.4	4566.83	5544.14	7158.84	7906.34	9976.82	12152.1	13230.5	13964	14384.6	13042	8606.54	9199.8
Jilin	566.97	585.65	654.52	768.89	852.51	943.49	1098.37	1329.68	1580.83	1915.29	2475.45	3097.12	3541.92	4506.31	5611.48	6376.77	6871.96	7286.59	7005.71	7004.95	6998.51
Heilongjiang	1432.9	1482.3	1556.7	1731.7	1773.3	1843.6	2084.7	2487.04	2971.68	3365.31	3695.58	4319.75	4060.72	5025.15	5962.41	6037.61	5846.67	5544.41	4798.08	4400.69	4060.6
Shanghai	1774.02	1871.89	1984.64	2207.63	2403.18	2622.45	3209.02	3892.12	4381.2	4969.95	5571.06	6085.84	6001.78	7218.32	7927.89	7854.77	7907.81	8167.71	7991	8406.28	9330.67
Jiangsu	3411.86	3640.1	3920.15	4435.89	4907.46	5604.49	6787.11	8437.99	10525	12282.9	14471.3	16993.3	18566.4	21753.9	25203.3	27122	29086.1	30854.5	32044.5	34619.5	38654.9
Zhejiang	2554.57	2766.94	2974.74	3273.93	3572.88	4090.48	5096.38	6250.38	7164.75	8511.51	10154.2	11567.4	11908.5	14297.9	16555.6	17316.3	18047.5	19175.1	19711.7	21194.6	22232.1
Anhui	828.85	920.5	974.32	1056.78	1254.88	1337.04	1535.29	1844.9	2245.9	2711.18	3370.96	4198.93	4905.22	6436.62	8309.38	9404.84	10390	11077.7	10946.8	11821.6	12838.3
Fujian	1214.81	1335.05	1434.3	1628.45	1803.5	2036.97	2340.82	2770.49	3175.92	3695.04	4476.42	5318.44	6005.3	7522.83	9069.2	10187.9	11329.6	12515.4	13064.8	14093.5	15354.3
Jiangxi	548.84	608.22	648.82	700.76	786.12	941.77	1204.33	1566.4	1917.47	2419.74	2975.53	3554.81	3919.45	5122.88	6390.55	6942.59	7713.02	8247.93	8411.57	8829.54	9627.98
Shandong	3147.37	3408.06	3644.32	4164.45	4556.01	5184.98	6485.05	8478.69	10478.6	12574	14647.5	17572	18901.8	21238.5	24017.1	25735.7	27442.8	28788.1	29485.9	31343.7	32942.8
Henan	1861.28	1937.83	1981.07	2294.15	2510.45	2768.75	3310.14	4182.1	5514.14	6724.61	8282.83	10260	11010.5	13226.4	15427.1	16672.2	16742.9	17816.6	17917.4	19275.8	21105.5
Hubei	1071.86	1199.08	1314.44	1437.38	1574.39	1709.89	1956.02	2320.6	2852.12	3365.08	4143.06	5082.07	6038.08	7767.24	9815.94	11193.1	11786.6	12852.4	13503.6	14654.4	15441.8
Hunan	1041.79	1123.08	1192.99	1293.18	1412.82	1523.5	1777.74	2190.54	2612.57	3187.05	3977.72	5028.93	5687.19	7343.19	9361.99	10506.4	11554	12482.1	12810.8	13341.2	14145.5
Guangdong	3704.39	4067.12	4359	4999.51	5506.06	6143.4	7592.78	9280.73	11356.6	13469.8	16004.6	18502.2	19419.7	23014.5	26447.4	27701	28994.2	31419.8	32613.5	35109.7	38008.1
Guangxi	614.07	667.29	682.34	732.76	771.18	846.89	984.08	1253.7	1510.68	1878.56	2425.29	3037.74	3381.54	4511.68	5675.32	6247.43	6731.32	7324.96	7717.52	8273.66	7450.85
Hainan	83.13	91.41	96.02	103.97	133.84	148.88	175.82	205.6	240.83	308.62	364.26	423.55	443.43	571	714.5	804.47	797.39	875.97	875.82	905.95	996.35
Chongqing	650.4	675.64	697.81	760.03	841.95	958.87	1135.31	1376.91	1564	1871.65	2368.53	3057.78	3448.77	4359.12	5543.04	5975.18	5812.29	6529.06	7069.37	7898.92	8584.61
Sichuan	1265.32	1324.01	1349.63	1433.11	1572.01	1733.38	2014.8	2489.4	3067.23	3775.14	4648.79	5823.39	6711.87	8672.18	11029.1	12333.3	13472	13962.4	13248.1	13448.9	14328.1
Guizhou	288.99	319.4	350.41	391.2	433.52	481.96	569.37	681.5	821.16	967.54	1124.79	1370.03	1476.62	1800.06	2194.33	2677.54	3276.24	3857.44	4147.83	4669.53	5428.14
Yunnan	743.82	818.26	811.9	833.25	868.06	934.88	1047.66	1281.63	1426.42	1705.83	2038.39	2452.75	2582.53	3223.49	3780.32	4419.2	4939.21	5281.82	5416.12	5690.16	6204.97
Shaanxi	567.25	607.82	681.43	782.58	878.82	1007.56	1221.17	1553.1	1951.36	2452.44	2986.46	3861.12	4236.42	5446.1	6935.59	8073.87	8912.34	9577.24	9082.13	9490.72	10882.9
Gansu	337.79	373.43	410.07	421.65	458.08	501.69	572.02	713.3	838.56	1043.19	1279.32	1470.34	1527.24	1984.97	2377.83	2600.09	2745.35	2926.45	2494.77	2515.56	2561.79
qinghai	76.63	85.44	94.03	108.83	125.09	144.51	171.92	211.7	264.61	331.91	419.03	557.12	575.33	744.63	975.18	1092.34	1151.28	1234.31	1207.31	1249.98	1162.41
Ningxia	88.67	95.11	103.82	121.43	135.89	153.06	194.27	244.05	281.05	351.58	455.04	609.98	662.32	827.91	1056.15	1159.37	1259.59	1341.24	1379.6	1488.44	1580.57
Xinjiang	385.37	395.75	420.48	537.58	573.91	603.15	719.54	914.47	1164.79	1459.3	1647.55	2070.76	1929.59	2592.15	3225.9	3481.56	3574.88	3948.96	3596.4	3647.01	4330.89

## Sheet: 5-People
Region	1997	1998	1999	2000	2001	2002	2003	2004	2005	2006	2007	2008	2009	2010	2011	2012	2013	2014	2015	2016	2017
Beijing	1240	1246	1257	1364	1385	1423	1456	1493	1538	1601	1676	1771	1860	1962	2019	2069	2115	2152	2171	2173	2171
Tianjin	953	957	959	1001	1004	1007	1011	1024	1043	1075	1115	1176	1228	1299	1355	1413	1472	1517	1547	1562	1557
Hebei	6525	6569	6614	6674	6699	6735	6769	6809	6851	6898	6943	6989	7034	7194	7241	7288	7333	7384	7425	7470	7520
Shanxi	3141	3172	3204	3247	3272	3294	3314	3335	3355	3375	3393	3411	3427	3574	3593	3611	3630	3648	3664	3682	3702
InnerMongolia	2326	2345	2362	2372	2381	2384	2386	2393	2403	2415	2429	2444	2458	2472	2482	2490	2498	2505	2511	2520	2529
Liaoning	4138	4157	4171	4184	4194	4203	4210	4217	4221	4271	4298	4315	4341	4375	4383	4389	4390	4391	4382	4378	4369
Jilin	2628	2644	2658	2682	2691	2699	2704	2709	2716	2723	2730	2734	2740	2747	2749	2750	2751	2752	2753	2733	2717
Heilongjiang	3751	3773	3792	3807	3811	3813	3815	3817	3820	3823	3824	3825	3826	3833	3834	3834	3835	3833	3812	3799	3789
Shanghai	1457	1464	1474	1609	1668	1713	1766	1835	1890	1964	2064	2141	2210	2303	2347	2380	2415	2426	2415	2420	2418
Jiangsu	7148	7182	7213	7327	7359	7406	7458	7523	7588	7656	7723	7762	7810	7869	7899	7920	7939	7960	7976	7999	8029
Zhejiang	4435	4456	4475	4680	4729	4776	4857	4925	4991	5072	5155	5212	5276	5447	5463	5477	5498	5508	5539	5590	5657
Anhui	6127	6184	6237	6093	6128	6144	6163	6228	6120	6110	6118	6135	6131	5957	5968	5988	6030	6083	6144	6196	6255
Fujian	3280	3299	3316	3410	3445	3476	3502	3529	3557	3585	3612	3639	3666	3693	3720	3748	3774	3806	3839	3874	3911
Jiangxi	4150	4191	4231	4149	4186	4222	4254	4284	4311	4339	4368	4400	4432	4462	4488	4504	4522	4542	4566	4592	4622
Shandong	8785	8838	8883	8998	9041	9082	9125	9180	9248	9309	9367	9417	9470	9588	9637	9685	9733	9789	9847	9947	10006
Henan	9243	9315	9387	9488	9555	9613	9667	9717	9380	9392	9360	9429	9487	9405	9388	9406	9413	9436	9480	9532	9559
Hubei	5873	5907	5938	5646	5658	5672	5685	5698	5710	5693	5699	5711	5720	5728	5758	5779	5799	5816	5852	5885	5902
Hunan	6465	6502	6532	6562	6596	6629	6663	6698	6326	6342	6355	6380	6406	6570	6596	6639	6691	6737	6783	6822	6860
Guangdong	7051	7143	7270	8650	8733	8842	8963	9111	9194	9442	9660	9893	10130	10441	10505	10594	10644	10724	10849	10999	11169
Guangxi	4633	4675	4713	4751	4788	4822	4857	4889	4660	4719	4768	4816	4856	4610	4645	4682	4719	4754	4796	4838	4885
Hainan	743	753	762	789	796	803	811	818	828	836	845	854	864	869	877	887	895	903	911	917	926
Chongqing	3042	3060	3075	2849	2829	2814	2803	2793	2798	2808	2816	2839	2859	2885	2919	2945	2970	2991	3017	3048	3075
Sichuan	8430	8493	8550	8329	8143	8110	8176	8090	8212	8169	8127	8138	8185	8045	8050	8076	8107	8140	8204	8262	8302
Guizhou	3606	3658	3710	3756	3799	3837	3870	3904	3730	3690	3632	3596	3537	3479	3469	3484	3502	3508	3530	3555	3580
Yunnan	4094	4144	4192	4241	4287	4333	4376	4415	4450	4483	4514	4543	4571	4602	4631	4659	4687	4714	4742	4771	4801
Shaanxi	3570	3596	3618	3644	3653	3662	3672	3681	3690	3699	3708	3718	3727	3735	3743	3753	3764	3775	3793	3813	3835
Gansu	2494	2519	2543	2515	2523	2531	2537	2541	2545	2547	2548	2551	2555	2560	2564	2578	2582	2591	2600	2610	2626
qinghai	496	503	510	517	523	529	534	539	543	548	552	554	557	563	568	573	578	583	588	593	598
Ningxia	530	538	543	554	563	572	580	588	596	604	610	618	625	633	639	647	654	662	668	675	682
Xinjiang	1718	1747	1774	1849	1876	1905	1934	1963	2010	2050	2095	2131	2159	2185	2209	2233	2264	2298	2360	2398	2445

## Sheet: 6-Urbanization
Region	1997	1998	1999	2000	2001	2002	2003	2004	2005	2006	2007	2008	2009	2010	2011	2012	2013	2014	2015	2016	2017
Beijing	66.41	67.05	67.75	68.51	69.37	70.9	72.23	73.49	83.62	84.33	84.5	84.9	85	85.96	86.2	86.2	86.3	86.35	86.5	86.5	86.5
Tianjin	57.22	57.53	57.99	58.31	58.66	58.97	59.37	59.69	75.11	75.73	76.31	77.23	78.01	79.55	80.5	81.55	82.01	82.27	82.64	82.93	82.93
Hebei	18.28	18.64	18.98	19.6	20.34	21.34	26.68	26.56	37.69	38.77	40.25	41.9	43.74	44.5	45.6	46.8	48.12	49.33	51.33	53.32	55.01
Shanxi	25.5	25.93	26.43	26.96	27.63	28.46	29.11	29.71	42.11	43.01	44.03	45.11	45.99	48.05	49.68	51.26	52.56	53.79	55.03	56.21	57.34
InnerMongolia	33.37	33.81	34.22	35.28	35.82	36.33	36.94	38.24	47.2	48.64	50.15	51.71	53.4	55.5	56.62	57.74	58.71	59.51	60.3	61.19	62.02
Liaoning	45.24	45.55	45.74	46	46.25	46.78	47.2	47.85	58.7	58.99	59.2	60.05	60.35	62.1	64.05	65.65	66.45	67.05	67.35	67.37	67.49
Jilin	42.92	43.13	43.27	43.51	43.79	44.46	44.96	45.17	52.52	52.97	53.16	53.21	53.32	53.35	53.4	53.7	54.2	54.81	55.31	55.97	56.65
Heilongjiang	45.02	45.25	45.52	45.75	46.03	46.28	47.04	48.14	53.1	53.5	53.9	55.4	55.5	55.66	56.5	56.9	57.4	58.01	58.8	59.2	59.4
Shanghai	72.24	72.99	73.84	74.62	75.28	76.36	77.61	81.16	89.09	88.7	88.7	88.6	88.6	89.3	89.3	89.3	89.6	89.6	87.6	87.9	87.7
Jiangsu	26.45	26.88	28.95	32.14	33.65	34.86	39.4	41.96	50.5	51.9	53.2	54.3	55.6	60.58	61.9	63	64.11	65.21	66.52	67.72	68.76
Zhejiang	19.56	20.4	21.21	22.11	23.15	24.19	25.43	26.74	56.02	56.5	57.2	57.6	57.9	61.62	62.3	63.2	64	64.87	65.8	67	68
Anhui	18.42	18.73	19.41	19.6	19.88	20.25	20.57	20.77	35.5	37.1	38.7	40.5	42.1	43.01	44.8	46.5	47.86	49.15	50.5	51.99	53.49
Fujian	19.44	19.85	20.31	20.61	21.1	33.46	29.7	30.94	49.4	50.4	51.4	53	55.1	57.1	58.1	59.6	60.77	61.8	62.6	63.6	64.8
Jiangxi	21.51	21.81	22.02	22.6	23.33	24.06	24.95	26.13	37	38.68	39.8	41.36	43.18	44.06	45.7	47.51	48.87	50.22	51.62	53.1	54.6
Shandong	26.22	25.88	26.02	26.85	27.89	29.04	31.11	32.21	45	46.1	46.75	47.6	48.32	49.7	50.95	52.43	53.75	55.01	57.01	59.02	60.58
Henan	17.2	17.54	17.79	18.2	18.91	19.29	19.96	21.27	30.65	32.47	34.34	36.03	37.7	38.5	40.57	42.43	43.8	45.2	46.85	48.5	50.16
Hubei	27.27	27.52	27.7	27.97	28.28	28.64	29.4	34.39	43.2	43.8	44.3	45.2	46	49.7	51.83	53.5	54.51	55.67	56.85	58.1	59.3
Hunan	18.8	19.2	19.62	20.1	20.53	21.02	21.35	21.39	37	38.71	40.45	42.15	43.2	43.3	45.1	46.65	47.96	49.28	50.89	52.75	54.62
Guangdong	30.99	31.19	31.19	31.18	31.61	36.18	47.67	48.66	60.68	63	63.14	63.37	63.4	66.18	66.5	67.4	67.76	68	68.71	69.2	69.85
Guangxi	17.32	17.45	17.54	17.48	17.77	18.03	18.31	18.46	33.62	34.64	36.24	38.16	39.2	40	41.8	43.53	44.81	46.01	47.06	48.08	49.21
Hainan	25.05	25.38	25.45	25.87	26.29	26.76	27.25	37.79	45.2	46.1	47.2	48	49.13	49.8	50.5	51.6	52.74	53.76	55.12	56.78	58.04
Chongqing	19.54	20.07	20.67	21.38	22.26	23.17	24.09	24.99	45.2	46.7	48.3	49.99	51.59	53.02	55.02	56.98	58.34	59.6	60.94	62.6	64.08
Sichuan	17.18	17.56	18.04	18.61	19.23	19.8	20.99	22.27	33	34.3	35.6	37.4	38.7	40.18	41.83	43.53	44.9	46.3	47.69	49.21	50.79
Guizhou	14.04	14.25	14.48	14.46	14.93	15.28	15.58	15.83	26.87	27.46	28.24	29.11	29.89	33.81	34.96	36.41	37.83	40.01	42.01	44.15	46.02
Yunnan	14.36	14.62	15.21	15.48	15.8	16.08	16.32	16.41	29.5	30.5	31.6	33	34	34.7	36.8	39.31	40.48	41.73	43.33	45.03	46.69
Shaanxi	21.47	21.81	22.18	22.84	23.28	23.89	24.49	24.89	37.23	39.12	40.62	42.1	43.5	45.76	47.3	50.02	51.31	52.57	53.92	55.34	56.79
Gansu	18.39	18.66	18.83	19.22	19.67	21.02	22.17	22.74	30.02	31.09	32.25	33.56	34.89	36.12	37.15	38.75	40.13	41.68	43.19	44.69	46.39
qinghai	28.25	28.36	28.35	28.33	28.52	28.87	29.22	29.45	39.25	39.26	40.07	40.86	41.9	44.72	46.22	47.44	48.51	49.78	50.3	51.63	53.07
Ningxia	27.74	28.37	28.6	28.72	28.97	29.5	34.21	35.19	42.28	43	44.02	44.98	46.1	47.9	49.82	50.67	52.01	53.61	55.23	56.29	57.98
Xinjiang	35.2	35.28	35.24	35.21	35.52	35.91	36.65	36.67	37.15	37.94	39.15	39.64	39.85	43.01	43.54	43.98	44.47	46.07	47.23	48.35	49.38

## Sheet: 7-Import&Export
Region	1997	1998	1999	2000	2001	2002	2003	2004	2005	2006	2007	2008	2009	2010	2011	2012	2013	2014	2015	2016	2017
Beijing	30388520	30506080	34359510	49621890	51541310	52505290	68500170	94575725	125506425	158036628	192999761	271692899	214733053	301721548	389555977	408107320	428995812	415518593	319440570	282348960	324017423
Tianjin	10331370	10613840	12600940	17154000	18172090	22811400	29342440	42028606	53276804	64461940	71449733	80400836	63831234	82100050	103376166	115634270	128501788	133886075	114282803	102655947	112919165
Hebei	4103280	4227320	4579950	5238620	5737310	6665250	8978250	13525851	16070353	18530877	25523410	38420533	29627252	42060370	53600835	50563060	54911571	59877359	51513748	46675380	49855543
Shanxi	1340620	1111130	1287500	1764380	1940980	2311540	3090130	5382487	5545655	6627099	11579483	14395057	8569032	12576225	14743057	15043110	15790979	16232813	14681315	16661411	17186875
InnerMongolia	1073010	962940	1294150	2622050	2034700	2434020	2829020	3721706	4876254	5960820	7735885	8918483	6774066	8729741	11930904	11258980	11994572	14556321	12731151	11640301	13873523
Liaoning	14905520	12744020	13718320	19031480	19807150	21739650	26509170	34410862	41013265	48390240	59474345	72433849	62934378	80712148	96035851	104090000	114478189	113998255	95947125	86556895	99595084
Jilin	1853590	1651910	2212340	2570420	3206850	3702480	6148410	6790448	6527723	7914038	10298001	13332125	11742407	16845182	22060930	24563010	25831735	26380786	18877390	18452886	18542971
Heilongjiang	2464560	2019550	2198300	2986370	3384260	4349150	5329400	6788995	9566017	12856547	17296593	23130593	16229513	25515415	38522675	37590290	38879095	38900926	21012034	16539178	18951195
Shanghai	29799980	31376230	38618120	54708020	60893150	72627110	112339550	160009920	186336738	227524196	282853878	322055310	277713611	368950652	437548615	436586950	441268216	466399838	449240723	433768191	476196649
Jiangsu	23628990	26341580	31257410	45636360	51350930	70288540	113617400	170849007	227922762	283978384	349471786	392271930	338739703	465798959	539580894	547961490	550802269	563553079	545560447	509296406	590778136
Zhejiang	14242220	14851000	18305610	27832620	32798610	41955760	61410810	85204882	107389656	139141607	176847368	211133730	187730863	253534656	309377765	312401360	335788705	355039765	346783826	336575909	377907471
Anhui	2377520	2331490	2648440	3346840	3619970	4180970	5947810	7211555	9119388	12245136	15932286	20183848	15677726	24273372	31309246	39284540	45518969	49177300	47844532	44412861	54021626
Fujian	18189090	17152960	17619190	21220460	22629520	28397370	35325530	47527013	54411187	62659633	74447381	84821068	79649592	108783289	143522428	155937960	169320901	177407841	168845931	156826190	171020040
Jiangxi	1332390	1246280	1313820	1624050	1530940	1694470	2528060	3527948	4064606	6194863	9448541	13617931	12778782	21619177	31468810	33413830	36746634	42730822	42399604	40028407	44338984
Shandong	17643990	16713890	18266980	24989760	28953710	33934480	44636820	60658222	76735872	95213815	122474443	158407511	139053369	189156292	235886076	245544320	266531533	276929398	240607798	234355852	264550956
Henan	1891070	1733720	1748850	2282900	2781760	3203160	4712170	6619553	7724918	9794566	12785127	17479337	13476415	17831514	32622578	51738810	59956868	64972209	73780562	71213099	77630090
Hubei	3204710	2832130	2677620	3222860	3577130	3953140	5109300	6765809	9054752	11762194	14868954	20705670	17251015	25932110	33586935	31963750	36380076	43039619	45552580	39388773	46337190
Hunan	1893420	1781720	1955460	2512220	2757790	2875840	3732360	5443515	6000189	7352256	9685853	12547194	10149466	14656390	18943763	21948730	25175308	30831603	29301801	26243470	36033297
Guangdong	130047340	129798040	140342410	170098880	176494690	221096310	283524770	357130622	427964967	527199096	634185954	684968798	611094049	784896124	913467331	984020460	1091581437	1076584474	1022495683	955298007	1006678374
Guangxi	2866310	2409100	1753400	2033790	1796990	2430490	3186750	4277221	5181504	6667562	9258997	13236168	14254726	17738906	23355966	29484460	32827499	40548851	51090547	47627431	57878659
Hainan	1926840	1743230	1217040	1287860	1747050	1866800	2274920	3401694	2542338	2846208	3514411	4528517	4881633	8648577	12756036	14322100	14985434	15862660	13966965	11348430	10374055
Chongqing	1663100	1033960	1208790	1785900	1833910	1793070	2594760	3857147	4292842	5469679	7437944	9521394	7712521	12427074	29207634	53203580	68692163	95431578	74466845	62753637	66601107
Sichuan	1823010	2092740	2468470	2545200	3099160	4468530	5634290	6866987	7901964	11020819	14378124	22113647	24168651	32693864	47724169	59143600	64574658	70202970	51188560	49306252	68106058
Guizhou	629240	627610	547580	659980	646450	691470	984330	1513727	1403572	1617713	2270300	3366208	2304212	3146801	4887579	6631560	8290101	10771326	12221418	5699617	8162313
Yunnan	1678930	1643800	1660110	1812760	1988780	2226760	2669130	3741169	4743441	6224836	8793567	9596916	8047595	13430120	16028773	21013730	25303558	29607422	24491279	19902360	23451109
Shaanxi	1731090	2050620	2005760	2140080	2062000	2224030	2782620	3642383	4576868	5360289	6887339	8328826	8405392	12101681	14647271	14799030	20128062	27364485	30498504	29947223	40202798
Gansu	478440	447880	406270	569530	778880	877400	1327140	1763145	2630274	3824932	5523670	6095433	3865554	7402953	8728579	8900750	10236106	8640615	7952016	6832980	4826333
qinghai	128600	117740	107850	159730	204900	196640	339140	575515	413307	651724	612073	688823	586785	788961	923817	1157470	1402742	1717888	1934472	1529204	655751
Ningxia	226030	238950	317990	442920	532770	442910	653230	908209	966574	1437127	1581515	1879404	1202479	1959989	2285746	2216710	3217686	5435212	3739255	3252489	5039517
Xinjiang	1123660	1524830	1765350	2264040	1771480	2691700	4769860	5634517	7940487	9103268	13715828	22217360	13947831	17130110	22819672	25170060	27561391	27672315	19669397	17637744	20568530

## Sheet: 8-Energy
Region	1997	1998	1999	2000	2001	2002	2003	2004	2005	2006	2007	2008	2009	2010	2011	2012	2013	2014	2015	2016	2017
Beijing	3833	3913	3986	4212	4313	4503	4708	5139.6	5522	5904	6285	6327	6570	6954	6995	7178	6724	6831	6853	6962	7133
Tianjin	2459	2445	2553	2794	2918	3022	3215	3696.68	4085	4500	4943	5364	5874	6818	7598	8208	7882	8145	8260	8245	8011
Hebei	9033	9151	9379	9893	10391	11588	13477	17347.8	19836	21794	23585	24322	25419	27531	29498	30250	29664	29320	29395	29794	30386
Shanxi	6983	6626	6501	6735	7968	9339	10387	11251	12750	14098	15601	15675	15576	16808	18315	19336	19761	19863	19384	19401	20057
InnerMongolia	3374	3050	3803	3540	4073	4560	5218	7622.54	9666	11221	12777	14100	15344	16820	18737	19786	17681	18309	18927	19457	19915
Liaoning	9474	9106	9384	10766	10656	10599	11449	13074.1	13611	14987	16544	17801	19112	20947	22712	23526	21721	21803	21667	21031	21556
Jilin	4333	3751	3693	3655	3863	4353	4991	5602.51	5315	5908	6557	7221	7698	8297	9103	9443	8645	8560	8142	8014	8015
Heilongjiang	6435	5975	6058	6166	6037	6004	6714	7465.67	8050	8731	9377	9979	10467	11234	12119	12758	11853	11955	12126	12280	12536
Shanghai	4759	4874	5208	5492	5818	6119	6698	7405.64	8225	8876	9670	10207	10367	11201	11270	11362	11346	11085	11387	11712	11859
Jiangsu	7991	8118	8164	8612	8881	9609	11060	13651.7	17167	19041	20948	22232	23709	25774	27589	28850	29205	29863	30235	31054	31430
Zhejiang	5069	5222	5457	5967	6530	7386	8525	10824.7	12032	13219	14524	15107	15567	16865	17827	18076	18640	18826	19610	20276	21030
Anhui	4405	4575	4683	4879	5118	5316	5842	6016.89	6506	7069	7739	8325	8896	9707	10570	11358	11696	12011	12332	12695	13052
Fujian	2536	2579	2772	2943	3163	3490	3925	5448.7	6142	6828	7587	8254	8916	9809	10653	11185	11190	12110	12180	12358	12890
Jiangxi	2132	2028	2134	2220	2329	2599	3035	3814	4286	4660	5053	5383	5813	6355	6928	7233	7583	8055	8440	8747	8995
Shandong	9154	9012	9068	8203	9955	11048	13034	19623.7	24162	26759	29177	30570	32420	34808	37132	38899	35358	36511	37945	38723	38684
Henan	6711	7244	7380	7876	8244	8603	9562	13074.2	14625	16232	17838	18976	19751	21438	23062	23647	21909	22890	23161	23117	22944
Hubei	6109	6046	5988	6269	6052	6713	7645	9120	10082	11049	12143	12845	13708	15138	16579	17675	15703	16320	16404	16850	17150
Hunan	4808	4894	4087	4071	4622	5045	5562	7599.2	9709	10581	11629	12355	13331	14880	16161	16744	14919	15317	15469	15804	16171
Guangdong	7953	8376	8735	9448	10179	11355	13099	15210.5	17921	19971	22217	23476	24654	26908	28480	29144	28480	29593	30145	31241	32342
Guangxi	2605	2438	2473	2669	2669	2982	3421	4203.28	4869	5390	5997	6497	7075	7919	8591	9155	9100	9515	9761	10092	10458
Hainan	390	407	431	480	520	658	796	742.48	822	920	1057	1135	1233	1359	1601	1688	1720	1820	1938	2006	2103
Chongqing	2656	3277	3689	4023	3016	3204	2972	3670	4943	5368	5947	6472	7030	7856	8792	9278	8049	8593	8934	9204	9545
Sichuan	6628	6750	6370	6590	6810	7510	9204	10700	11816	12986	14214	15145	16322	17892	19696	20575	19212	19879	19888	20362	20874
Guizhou	3960	4315	4018	4325	4438	4470	5542	6021	5641	6172	6800	7084	7566	8175	9068	9878	9299	9709	9948	10227	10482
Yunnan	3429	3364	3288	3207	3490	3939	4151	5209.81	6024	6621	7133	7511	8032	8674	9540	10434	10072	10455	10357	10656	11091
Shaanxi	3111	3022	2668	2731	3257	3713	3952	4775.96	5571	6129	6775	7417	8044	8882	9761	10626	10610	11222	11716	12120	12537
Gansu	2581	2687	2917	3012	2905	3018	3525	3907.74	4368	4743	5109	5346	5482	5923	6496	7007	7287	7521	7523	7334	7538
qinghai	707	739	939	879	930	1019	1123	1364.4	1670	1903	2095	2279	2348	2568	3189	3524	3768	3992	4134	4111	4202
Ningxia	805	827	848	837.5	1648.81	2460.11	2598	2322.23	2536	2830	3077	3229	3388	3681	4316	4562	4781	4946	5405	5592	6489
Xinjiang	3230	3280	3215	3316	3496	3622	4037	4909.66	5506	6047	6576	7069	7526	8290	9927	11831	13632	14926	15651	16302	17392
